# Supplementary material for: Genome sequencing of turmeric provides evolutionary insights into its medicinal properties
Source: PubMed Central journal article supplement (PMC8521574; doi:10.1038/s42003-021-02720-y), 2021-10-15
Supplement: 42003_2021_2720_MOESM2_ESM.pdf [file 42003_2021_2720_MOESM2_ESM.pdf]

## **Description of Additional Supplementary Files**

**File name:** Supplementary Data 1.

**Description:** The details of *C. longa* genes showing multiple signs of adaptive evolution (MSA).
